# Supplementary material for: Early human lung immune cell development and its role in epithelial cell fate
Source: PubMed Central journal article supplement (PMC7615868; doi:10.1126/sciimmunol.adf9988), 2023-12-15

TP63

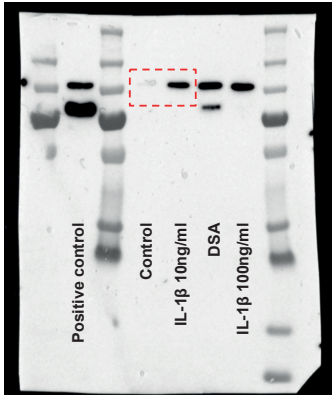

$\beta$ -actin

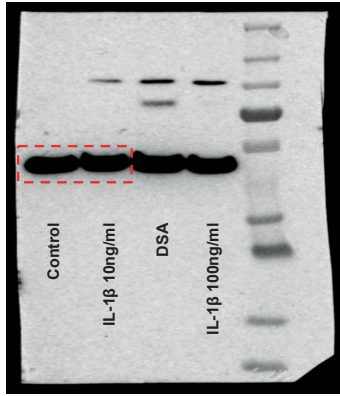

SOX9

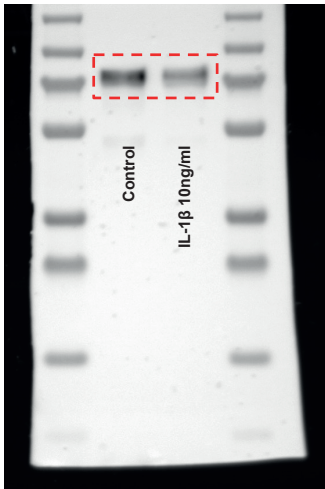

SOX2

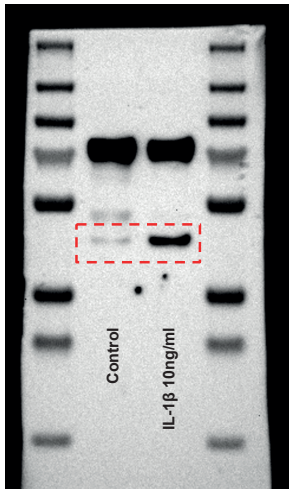

$\beta$ -actin

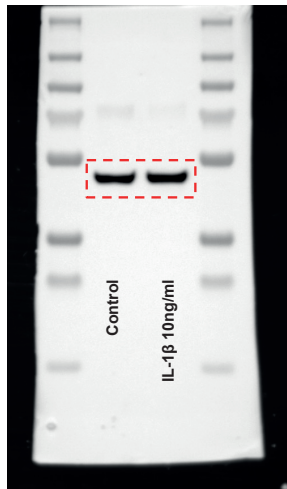

Supplement: EMS195344-supplement-Data_File_S5_Western_blot_uncropped_data.pdf [file EMS195344-supplement-Data_File_S5_Western_blot_uncropped_data.pdf]
